# Supplementary material
Source: PubMed Central journal article supplement (PMC3618565)
Supplement: NIHMS431725-supplement-Supplementary_Data.pdf [file NIHMS431725-supplement-Supplementary_Data.pdf]

**Table S1. Primers used in additional primer extension study**

| Name | Primer sequences (5' to 3') | Purpose          |
|------|-----------------------------|------------------|
| R2   | cttcagagtgaagtgcttgg        | Primer extension |
| R4   | tacttccgggtccggagctg        | Primer extension |
| R5   | gttggttttcatgggtcggg        | Primer extension |
| RTr1 | tcaacaacagactgagcacg        | Primer extension |

**Table S2. Cleavage sites of MazF-ec/loop2-mt3 in *ompA* mRNA**

---

| <b>Cleavage site</b> |
|----------------------|
| UG AAAA^C CAA        |
| GG UAAA^C CGU        |
| UG AAAA^C GGU        |
| GC UAAA^C UGG        |
| UA AAAA^C CAC        |

---

| <b>NOT cleavage site</b> |
|--------------------------|
| CU GAAAC CGG             |
| UA CAAAG GCA             |
| UA CAAAG CUC             |
| CC GAAAG ACG             |
| AC UAAAU CCA             |
| CU GAAAU CGC             |
| UU GAAAU GGG             |

---

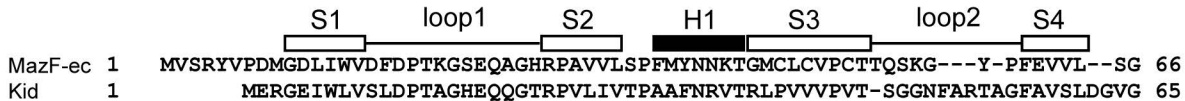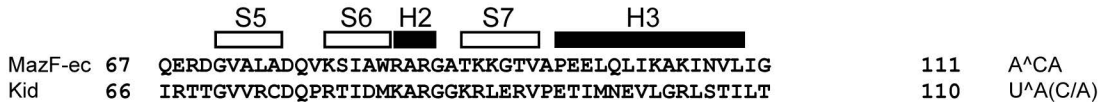

*Figure S1.*

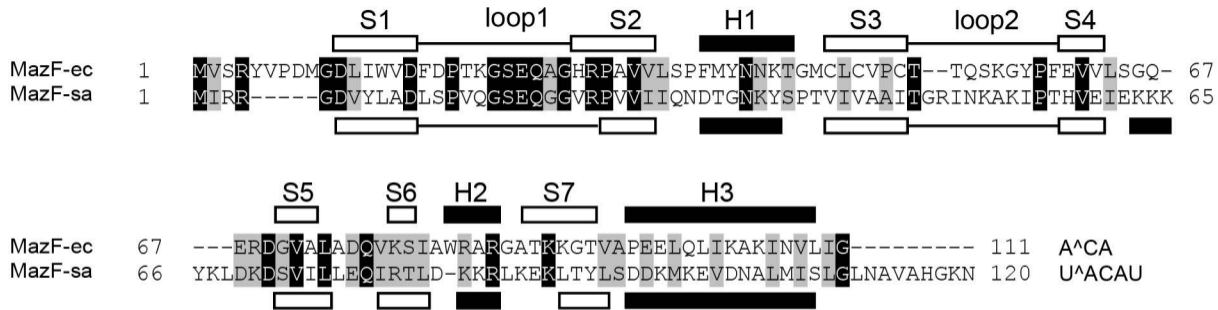

Figure S2.

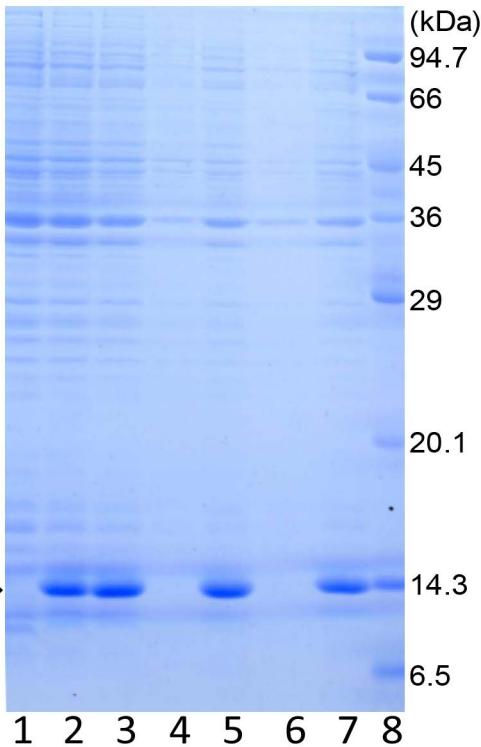

*Figure S3.*
